# Supplementary material
Source: PubMed Central journal article supplement (PMC4019187)
Supplement: IAI.01542-14_zii999090695so1.pdf [file IAI.01542-14_zii999090695so1.pdf]

Supplementary Table 1 Primers used in this study

|                   | 5' – 3'                                     | Restriction site |
|-------------------|---------------------------------------------|------------------|
| <i>isdC-A</i>     | AGGGAACAAAAGCTGGGTACCCCATGTCATTTTACAACAAGG  |                  |
| <i>isdC-B</i>     | CACGCTTATTTTGCCTCCTT                        |                  |
| <i>isdC-C</i>     | GCAAAATAAGCGTGTAATAATGTCTAAGCGTTTG          |                  |
| <i>isdC-D</i>     | CACTATAGGGCGAATTGGAGCTCCTGTTGATGGTGTAATATTG |                  |
| <i>isdC-X</i>     | GATTTATTTATTCCCGGGTTGCTGC                   | SmaI             |
| <i>isdC-Y</i>     | GCAGCAACCCCGGAATAAATAAATC                   | SmaI             |
| <i>isdC-F</i>     | GCAAAATAACCATGGAAACAGTATTTAAAA              | NcoI             |
| <i>isdC-R</i>     | TTCAAAAGCTTAGACATTATTAGTGGTTACC             | HindIII          |
| LPXTG-A           | TGAGGTAATTCAACTGAAGATCCATCAGT               |                  |
| LPXTG-B           | AACGGGGGCTGGTACACCGGCATATGT                 |                  |
| <i>srtB-A</i>     | AGGGAACAAAAGCTGGGTACCGCAAAGATAGTGTCGTGAA    | KpnI             |
| <i>srtB-B</i>     | CATTTGTTGTGTCCGCCTCG                        |                  |
| <i>srtB-C</i>     | GCGGACACAACAAATGTAGAAAAGGAGCATGTAGC         |                  |
| <i>srtB-D</i>     | ATAGGGCGAATTGGAGCTCCATCGCATAGGAACTTAGTGG    | SacI             |
| <i>srtB-Scr.F</i> | GTCGCTAATCGCTGAGCTAACGC                     |                  |
| <i>srtB-Scr.R</i> | ATCCTCATCTTGCTTATGTACC                      |                  |
| <i>atlI-A</i>     | CGTTATCGAGCTCTGAAGATGCGTATAG                | SacI             |
| <i>atlI-B</i>     | CACTTATTTACCTCCATCAATTCTCTATTCC             |                  |
| <i>atlI-C</i>     | TGATGGAGGTAATAAGTGTAAGAAGCATTGTGAATGC       |                  |
| <i>atlI-D</i>     | CGATTGAATTCGACGTACCTTATTCTTC                | EcoRI            |
| <i>atlI-Scr.F</i> | CTATGACAAAATTTTAAAAAGAAACGATGC              |                  |
| <i>atlI-Scr.R</i> | ATTAGTCTAGTGGGAAATATTAGCTTCG                |                  |
